# Supplementary material for: Reduction of Polycyclic Aromatic Hydrocarbons (PAHs) in Sesame Oil Using Cellulosic Aerogel
Source: PubMed Central journal article supplement (PMC8003230; doi:10.3390/foods10030644), 2021-03-18
Supplement: foods-10-00644-s001.pdf [file foods-10-00644-s001.pdf]

**Table 1.** Effects of cellulose based adsorbents and commercial adsorbents on the levels of Benzo[*a*]pyrene (BaP,  $\mu\text{g}/\text{kg}$ ) and adsorption efficiency (% in parentheses) in sesame oil spiked with 12.93  $\mu\text{g}/\text{kg}$  BaP.

| Adsorbents<br>(%, w/w) | Cellulose based adsorbents                      |                            |                           |                           | Commercial adsorbents     |                            |                            |
|------------------------|-------------------------------------------------|----------------------------|---------------------------|---------------------------|---------------------------|----------------------------|----------------------------|
|                        | Tulip wood                                      | Pine                       | Eulalia                   | Raiata pine               | Active carbon             | Acid clay                  | Aluminium silicate         |
|                        | <b>BaP (<math>\mu\text{g}/\text{kg}</math>)</b> |                            |                           |                           |                           |                            |                            |
| <b>0</b>               | 12.93 <sup>a</sup>                              | 12.93 <sup>a</sup>         | 12.93 <sup>a</sup>        | 12.93 <sup>a</sup>        | 12.93 <sup>a</sup>        | 12.93 <sup>a</sup>         | 12.93 <sup>a</sup>         |
| <b>0.3</b>             | 11.12 <sup>b</sup> (14.03)                      | 10.61 <sup>b</sup> (17.95) | 8.85 <sup>b</sup> (31.56) | 9.91 <sup>b</sup> (23.42) | 9.95 <sup>b</sup> (23.11) | 12.29 <sup>b</sup> (4.95)  | 11.37 <sup>b</sup> (12.12) |
| <b>0.6</b>             | 10.77 <sup>c</sup> (16.74)                      | 9.65 <sup>c</sup> (25.37)  | 8.26 <sup>c</sup> (36.16) | 9.40 <sup>c</sup> (27.33) | 9.41 <sup>c</sup> (27.27) | 11.99 <sup>c</sup> (7.31)  | 11.04 <sup>c</sup> (14.67) |
| <b>1</b>               | 10.39 <sup>d</sup> (19.65)                      | 8.86 <sup>d</sup> (31.49)  | 7.14 <sup>d</sup> (44.76) | 9.17 <sup>c</sup> (29.11) | 8.29 <sup>d</sup> (35.90) | 11.60 <sup>d</sup> (10.30) | 10.64 <sup>d</sup> (17.74) |
| <b>3</b>               | 9.17 <sup>e</sup> (29.09)                       | 8.15 <sup>e</sup> (37.00)  | 6.89 <sup>d</sup> (46.74) | 8.55 <sup>d</sup> (33.87) | 5.00 <sup>e</sup> (61.38) | 11.19 <sup>e</sup> (13.47) | 10.38 <sup>d</sup> (19.74) |
| <b>5</b>               | 8.41 <sup>f</sup> (35.02)                       | 7.86 <sup>e</sup> (39.17)  | 6.81 <sup>d</sup> (47.32) | 8.33 <sup>d</sup> (35.57) | 4.19 <sup>e</sup> (67.59) | 11.24 <sup>e</sup> (13.09) | 9.96 <sup>d</sup> (22.97)  |

<sup>a-f</sup> Values followed by different letters differ significantly ( $p < 0.05$ ) as a function of the adsorbents concentration (%) at the same adsorbent by Duncan's test.

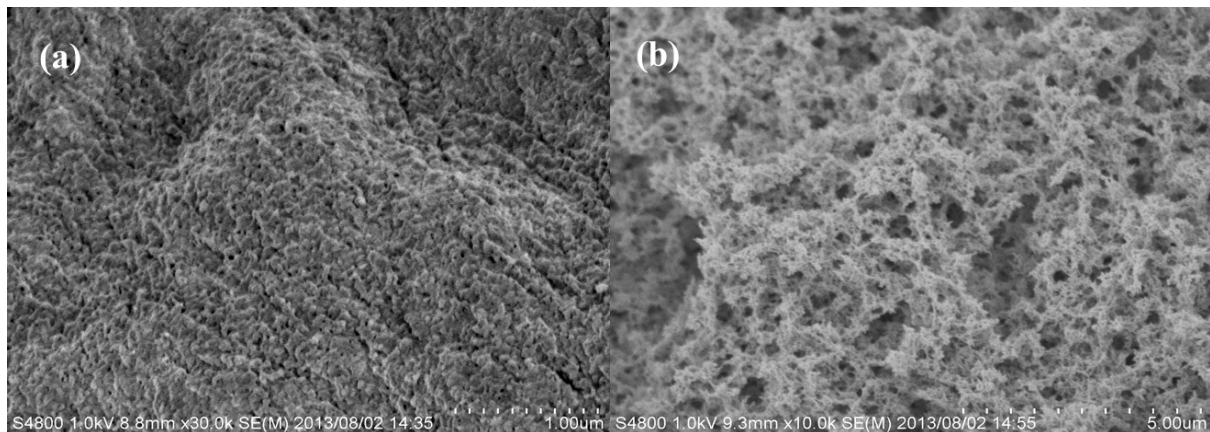

**Figure 1.** Scanning electron micrographs of the eulalia-based cellulosic aerogel; surface (a) and inside (b).
